# Supplementary material for: Psychiatric Readmissions in a Community-Based Sample of Patients With Mental Disorders
Source: Atypon-hosted journal article supplement (doi:10.1176/appi.ps.201400092), 2015-04-01
Supplement: appi.ps.201400092.ds001.pdf [file appi.ps.201400092.ds001.pdf]

Health services utilization characteristics of psychiatric inpatients by readmission status  
(N=4663)

|                                                                | Total<br>N=4663 |                | Readmitted<br>N=762 |                | Not readmitted<br>N = 3901 |                | P-value |
|----------------------------------------------------------------|-----------------|----------------|---------------------|----------------|----------------------------|----------------|---------|
|                                                                | N               | % <sup>a</sup> | N                   | % <sup>a</sup> | N                          | % <sup>a</sup> |         |
| Length of index hospitalization (M ± SD)                       | 6.8 ±11.7       |                | 7.6 ±10.9           |                | 6.7 ±11.6                  |                | .03     |
| Hospitalization prior to index hospitalization                 | 91              | 2.0            | 38                  | 4.9            | 53                         | 1.4            | .001    |
| <b>Receipt of outpatient clinical services after discharge</b> |                 |                |                     |                |                            |                |         |
| No visit                                                       | 2524            | 54.1           | 484                 | 63.5           | 2040                       | 52.3           | .001    |
| Therapy                                                        | 1545            | 33.1           | 268                 | 35.2           | 1277                       | 32.7           | .2      |
| Case management                                                | 780             | 16.7           | 128                 | 16.8           | 652                        | 16.7           | .9      |
| Medication management                                          | 1105            | 23.7           | 124                 | 16.3           | 981                        | 25.2           | .001    |
| Visit rate after discharge <sup>b</sup> (M ±SD)                | .09 ±.2         |                | .1 ±.2              |                | .08 ±.1                    |                | .001    |

<sup>a</sup> Percentages represent column percentages

<sup>b</sup> Number of visits post-discharge divided by the days until readmission or censoring (30 days)
